# Supplementary material for: The Fundamental Role of Meaning and Purpose in Life in Personal and Social Well-Being: A Cross-sectional Exploratory Investigation in University Students
Source: Research Square preprint supplement (doi:10.21203/rs.3.rs-7411109/v1), 2025-09-01
Supplement: Supplementary file 1 [file 07230493e63d2ecfd9e4d0ec.pdf]

**Additional file 2.** Complete results for mediation pathways between both social connectedness (SCS-R) and anxiety (GAD-7) with presence of and search for meaning in life (MLQ) and purpose in life (LET) as potential mediators. MLQ-P = Presence of meaning in life, MLQ-S = Search for meaning in life, LET = Life Engagement Test, GAD-7 = Generalized Anxiety Disorder Scale, SCS-R = Social Connectedness Scale - Revised.

Indirect and Total Effects

| Type      | Effect                                        | Estimate | SE      | 95% C.I. (a) |          | $\beta$ | z      | p     |
|-----------|-----------------------------------------------|----------|---------|--------------|----------|---------|--------|-------|
|           |                                               |          |         | Lower        | Upper    |         |        |       |
| Indirect  | SCS-R $\Rightarrow$ MLQ-P $\Rightarrow$ GAD-7 | -0.01232 | 0.00848 | -0.0308      | 0.00479  | -0.0382 | -1.45  | 0.146 |
|           | SCS-R $\Rightarrow$ MLQ-S $\Rightarrow$ GAD-7 | -0.00623 | 0.00235 | -0.0109      | -0.00218 | -0.0193 | -2.65  | 0.008 |
|           | SCS-R $\Rightarrow$ LET $\Rightarrow$ GAD-7   | -0.02795 | 0.01051 | -0.0502      | -0.00372 | -0.0866 | -2.66  | 0.008 |
| Component | SCS-R $\Rightarrow$ MLQ-P                     | 0.18945  | 0.01196 | 0.1622       | 0.21557  | 0.5298  | 15.84  | <.001 |
|           | MLQ-P $\Rightarrow$ GAD-7                     | -0.06500 | 0.04458 | -0.1611      | 0.02518  | -0.0720 | -1.46  | 0.145 |
|           | SCS-R $\Rightarrow$ MLQ-S                     | -0.05585 | 0.01520 | -0.0881      | -0.02469 | -0.1434 | -3.68  | <.001 |
|           | MLQ-S $\Rightarrow$ GAD-7                     | 0.11154  | 0.02917 | 0.0561       | 0.16472  | 0.1346  | 3.82   | <.001 |
|           | SCS-R $\Rightarrow$ LET                       | 0.15198  | 0.00777 | 0.1338       | 0.16955  | 0.6109  | 19.56  | <.001 |
|           | LET $\Rightarrow$ GAD-7                       | -0.18392 | 0.06851 | -0.3255      | -0.02353 | -0.1418 | -2.68  | 0.007 |
| Direct    | SCS-R $\Rightarrow$ GAD-7                     | -0.10049 | 0.01405 | -0.1338      | -0.07132 | -0.3114 | -7.15  | <.001 |
| Total     | SCS-R $\Rightarrow$ GAD-7                     | -0.14699 | 0.01134 | -0.1729      | -0.12613 | -0.4555 | -12.96 | <.001 |

Note. Confidence intervals computed with method: Bootstrap percentiles

Note. Betas are completely standardized effect sizes
