# Supplementary material for: The Fundamental Role of Meaning and Purpose in Life in Personal and Social Well-Being: A Cross-sectional Exploratory Investigation in University Students
Source: Research Square preprint supplement (doi:10.21203/rs.3.rs-7411109/v1), 2025-09-01
Supplement: Supplementary file 2 [file 19876feedefdf2fdcbe6a0f1.pdf]

**Additional file 1.** Complete results for mediation pathways between loneliness (UCLA-3) and social connectedness (SCS-R) with presence of and search for meaning in life (MLQ) and purpose in life (LET) as potential mediators. UCLA-3 = UCLA Loneliness Scale, MLQ-P = Presence of meaning in life, MLQ-S = Search for meaning in life, LET = Life Engagement Test, SCS-R = Social Connectedness Scale - Revised.

Indirect and Total Effects

| Type             | Effect                                                                      | Estimate | SE     | 95% C.I. (a) |        | $\beta$  | z      | p     |
|------------------|-----------------------------------------------------------------------------|----------|--------|--------------|--------|----------|--------|-------|
|                  |                                                                             |          |        | Lower        | Upper  |          |        |       |
| <b>Indirect</b>  | <b>UCLA-3 <math>\Rightarrow</math> MLQ-P <math>\Rightarrow</math> SCS-R</b> | -0.5859  | 0.1602 | -0.9358      | -0.259 | -0.05839 | -3.66  | <.001 |
|                  | <b>UCLA-3 <math>\Rightarrow</math> MLQ-S <math>\Rightarrow</math> SCS-R</b> | 0.0820   | 0.0513 | -0.0129      | 0.196  | 0.00817  | 1.60   | 0.110 |
|                  | <b>UCLA-3 <math>\Rightarrow</math> LET <math>\Rightarrow</math> SCS-R</b>   | -1.3779  | 0.2147 | -1.8294      | -0.923 | -0.13734 | -6.42  | <.001 |
| <b>Component</b> | <b>UCLA-3 <math>\Rightarrow</math> MLQ-P</b>                                | -1.4579  | 0.1293 | -1.7217      | -1.162 | -0.40635 | -11.28 | <.001 |
|                  | <b>MLQ-P <math>\Rightarrow</math> SCS-R</b>                                 | 0.4019   | 0.1040 | 0.1855       | 0.622  | 0.14371  | 3.87   | <.001 |
|                  | <b>UCLA-3 <math>\Rightarrow</math> MLQ-S</b>                                | 0.6980   | 0.1516 | 0.3950       | 0.990  | 0.17868  | 4.60   | <.001 |
|                  | <b>MLQ-S <math>\Rightarrow</math> SCS-R</b>                                 | 0.1175   | 0.0689 | -0.0201      | 0.248  | 0.04575  | 1.70   | 0.088 |
|                  | <b>UCLA-3 <math>\Rightarrow</math> LET</b>                                  | -1.2276  | 0.0857 | -1.4029      | -1.039 | -0.49181 | -14.32 | <.001 |
|                  | <b>LET <math>\Rightarrow</math> SCS-R</b>                                   | 1.1224   | 0.1563 | 0.7951       | 1.459  | 0.27925  | 7.18   | <.001 |
|                  |                                                                             |          |        |              |        |          |        |       |
| <b>Direct</b>    | <b>UCLA-3 <math>\Rightarrow</math> SCS-R</b>                                | -4.9001  | 0.2997 | -5.6003      | -4.181 | -0.48841 | -16.35 | <.001 |
| <b>Total</b>     | <b>UCLA-3 <math>\Rightarrow</math> SCS-R</b>                                | -6.7819  | 0.2918 | -7.3639      | -6.220 | -0.67597 | -23.24 | <.001 |

Note. Confidence intervals computed with method: Bootstrap percentiles

Note. Betas are completely standardized effect sizes
