# Supplementary material for: The Fundamental Role of Meaning and Purpose in Life in Personal and Social Well-Being: A Cross-sectional Exploratory Investigation in University Students
Source: Research Square preprint supplement (doi:10.21203/rs.3.rs-7411109/v1), 2025-09-01
Supplement: Supplementary file 3 [file 4ca0ed974a9c6adc5a9f1582.pdf]

**Additional file 3.** Complete results for mediation pathways between anxiety (GAD-7) and overall displaced aggression (DAQ) with presence of and search for meaning in life (MLQ) and purpose in life (LET) as potential mediators. MLQ-P = Presence of meaning in life, MLQ-S = Search for meaning in life, LET = Life Engagement Test, GAD-7 = Generalized Anxiety Disorder Scale, DAQ = Displaced Aggression Questionnaire.

Indirect and Total Effects

| Type      | Effect                                      | Estimate | SE     | 95% C.I. (a) |        | $\beta$ | z      | p     |
|-----------|---------------------------------------------|----------|--------|--------------|--------|---------|--------|-------|
|           |                                             |          |        | Lower        | Upper  |         |        |       |
| Indirect  | GAD-7 $\Rightarrow$ MLQ-P $\Rightarrow$ DAQ | 0.1068   | 0.0999 | -0.1219      | 0.341  | 0.0210  | 1.07   | 0.285 |
|           | GAD-7 $\Rightarrow$ MLQ-S $\Rightarrow$ DAQ | 0.0744   | 0.0472 | -0.0208      | 0.171  | 0.0147  | 1.57   | 0.115 |
|           | GAD-7 $\Rightarrow$ LET $\Rightarrow$ DAQ   | 0.3404   | 0.1181 | 0.0732       | 0.640  | 0.0671  | 2.88   | 0.004 |
| Component | GAD-7 $\Rightarrow$ MLQ-P                   | -0.4105  | 0.0413 | -0.5022      | -0.321 | -0.3715 | -9.94  | <.001 |
|           | MLQ-P $\Rightarrow$ DAQ                     | -0.2601  | 0.2419 | -0.8104      | 0.295  | -0.0567 | -1.08  | 0.282 |
|           | GAD-7 $\Rightarrow$ MLQ-S                   | 0.2789   | 0.0467 | 0.1907       | 0.361  | 0.2337  | 5.97   | <.001 |
|           | MLQ-S $\Rightarrow$ DAQ                     | 0.2666   | 0.1633 | -0.0818      | 0.582  | 0.0627  | 1.63   | 0.103 |
|           | GAD-7 $\Rightarrow$ LET                     | -0.3225  | 0.0281 | -0.3855      | -0.266 | -0.4191 | -11.47 | <.001 |
|           | LET $\Rightarrow$ DAQ                       | -1.0555  | 0.3545 | -1.9560      | -0.240 | -0.1601 | -2.98  | 0.003 |
| Direct    | GAD-7 $\Rightarrow$ DAQ                     | 1.2995   | 0.2082 | 0.8551       | 1.751  | 0.2562  | 6.24   | <.001 |
| Total     | GAD-7 $\Rightarrow$ DAQ                     | 1.8210   | 0.1908 | 1.4355       | 2.222  | 0.3590  | 9.55   | <.001 |

Note. Confidence intervals computed with method: Bootstrap percentiles

Note. Betas are completely standardized effect sizes
